# Supplementary material for: Right Coronary Artery May Grow Even Better than Normal After Arterial Switch Operation for Complete Transposition of the Great Arteries
Source: Research Square preprint supplement (doi:10.21203/rs.3.rs-96030/v1), 2020-10-26
Supplement: Supplementary file 1 [file 5076a5c26bbe37b55b6e13cc.docx]

**Table 1. List of d-TGA patients**

No. Age at ASO(d) Gender Age at CAG(y) BSA at CAG(m2)  TGA type Shaher type Surgery

1 13 f 6.4 0.77 d-TGA/IVS 1 ASO, LeCompte*, ASD closure

2 11 m 5.9 0.68 d-TGA/IVS 1 ASO, LeCompte, ASD closure

3 18 m 5.5 0.70 d-TGA/IVS 1 ASO, LeCompte, ASD closure, PA plasty

4 19 m 6.4 0.75 d-TGA/IVS 1 ASO, LeCompte, ASD closure

5 18 f 6.2 0.75 d-TGA/IVS 1 ASO, LeCompte, ASD closure

6 18 m 6.3 0.75 d-TGA/IVS 2A ASO, LeCompte, ASD closure

7 13 m 5.4 0.69 d-TGA/IVS 1 ASO, LeCompte, ASD closure

8 18 f 5.4 0.70 d-TGA/IVS 1 ASO, LeCompte, ASD closure

9 19 f 6.5 0.78 d-TGA/IVS 2A ASO, LeCompte, ASD closure

10 17 m 5.9 0.80 d-TGA/IVS 1 ASO, LeCompte, ASD closure

11 13 m 6.3 0.66 d-TGA/IVS 5A ASO, Modified Mee techniuque, Lecompte, ASD closure

12 191 m 3.6 0.74 d-TGA/VSD 5A Imai technique, VSD closure, PA plasty

13 48 f 6.3 0.82 d-TGA/VSD 5A Imai technique, VSD closure, PA plasty

14 20 f 6.2 0.78 d-TGA/VSD 1 ASO, LeCompte, VSD closure, ASD closure

15 38 m 5.7 0.80 d-TGA/VSD 1 ASO, LeCompte, VSD closure, ASD closure

16 13 m 6.0 0.70 d-TGA/VSD 2A ASO, LeCompte, VSD closure, ASD closure

17 13 f 5.9 0.79 d-TGA/VSD 1 ASO, LeCompte, VSD closure, ASD closure

18 17 f 6.2 0.80 d-TGA/VSD 1 ASO, LeCompte, VSD closure, ASD closure

*LeCompte maneuver; ASD: arterial septal defect; ASO: arterial switch operation; PA: pulmonary artery; d-TGA/IVS: complete transposition of the great arteries with intact ventricular septum; d-TGA/VSD: complete transposition of the great arteries with ventricular septal defect

**Table 2. Coronary cubage indexes (cubage / BSA****))**

Coronary artery TGA group control group p

Left 1.05 ± 0.34 0.94 ± 0.34 0.598

Right 1.08 ± 0.44 0.54 ± 0.37 0.007

Total 2.13 ± 0.70 1.47 ± 0.60 0.026

BSA: body surface area; TGA: complete transposition of the great arteries;

Continuous variables were expressed as mean ± standard deviation
